# Supplementary material for: Use of Nanoparticles to Prevent Resistance to Antibiotics—Synthesis and Characterization of Gold Nanosystems Based on Tetracycline
Source: MDPI journal article supplement (doi:10.3390/pharmaceutics14091941), 2022-09-14
Supplement: s1 [file s1]

# Supplementary Materials: Use of nanoparticles to prevent resistance to antibiotics—Synthesis and characterization of gold nanosystems based on Tetracycline

Rosa M. Giráldez-Pérez, Elia Grueso, Raquel Jiménez-Aguayo, Alfonso Carbonero, Marina González-Bravo, Edyta Kuliszewska and Rafael Prado-Gotor

## NMR Characterization of 16-3-16 gemini surfactant

For NMR spectroscopic measurements, the two compounds (see Fig. S10 for structure) were dissolved in 99.95% CDCl<sub>3</sub> (~10 mg in 0.7 mL) and transferred to 5 mm NMR sample tubes (Promochem, Wesel, Germany). Spectra were measured on a Bruker DRX-400 AVANCE spectrometer at 400.13 MHz (<sup>1</sup>H) or 100.62 MHz (<sup>13</sup>C) using the Topspin 1.3 (Bruker, Rheinstetten, Germany). For 1D spectra, 32k data points were recorded and Fourier transformed to spectra with a range of 15 ppm (<sup>1</sup>H) and 240 ppm (<sup>13</sup>C). Two-dimensional COSY, TOCSY, NOESY, HMQC and HMBC spectra were measured with 128 experimental runs having 1024 data points each. Appropriate linear forward prediction, sinusoidal multiplication and Fourier transformation led to 2D-spectra with ranges of 12 ppm and 220 ppm for <sup>1</sup>H and <sup>13</sup>C, respectively. Residual CHCl<sub>3</sub> was used as the internal standard for <sup>1</sup>H ( $\delta_{\text{H}}$  7.24) and CDCl<sub>3</sub> for <sup>13</sup>C ( $\delta_{\text{C}}$  77.0) spectra. Measurement temperature was 298.1 K  $\pm$  0.1 K.

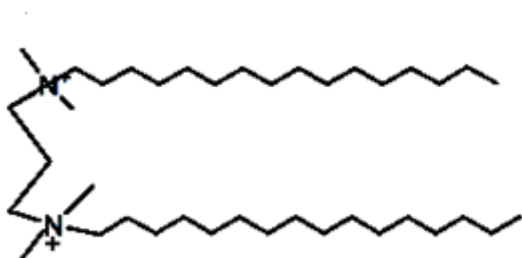

**Figure S1.** Structure of the 16-3-16 gemini surfactant compound used for the formation of Au@16-3-16 gold nanoparticles.

**1,3-Propanediyl-bis-(dimethylhexadecylammonium bromide) (16-3-16).** Yield = 68%. Elemental analysis ( $C_{39}H_{84}N_2Br_2$ ,  $M_r=740.9057$ ). Calc. for trihydrate (%): C 63.22; H 11.43; N 3.78. Found (%): C 61.78; H 10.98; N 3.67.  $^1H$ -NMR (400 MHz,  $CDCl_3$ ,  $\delta$  in ppm): 3.87 (m, 4H,  $N^+-CH_2-CH_2-CH_2-N^+$ ); 3.49 (m, 4H,  $N^+-CH_2-$ ); 3.36 (s, 12H,  $N^+-CH_3$ ); 2.74 (m, 2H,  $N^+-CH_2-CH_2-CH_2-N^+$ ); 1.79 (m, 4H,  $N^+-CH_2-CH_2-$ ); 1.38-1.24 (m, 52H,  $-(CH_2)_{13}-$ ); 0.87 (t, 6H,  $-CH_3$ ).  $^{13}C$  NMR (100 MHz,  $CDCl_3$ ,  $\delta$  in ppm): 67.3 ( $N^+-CH_2-$ ); 61.6 ( $N^+-CH_2-CH_2-CH_2-N^+$ ); 51.7 ( $N^+-CH_3$ ); 32.2, 29.9, 29.8, 29.8, 29.8, 29.8, 29.6, 29.6, 29.6, 29.5, 29.5, 26.7, 23.1 ( $-(CH_2)_{13}-$ ); 23.4 ( $N^+-CH_2-CH_2-$ ); 19.2 ( $N^+-CH_2-CH_2-CH_2-N^+$ ); 14.6 ( $-CH_3$ ). Mass spectroscopy:  $(m/z) = 740.50$ ;  $[M^{++79}Br^-]^+ = 661.5$ ;  $[M^{++81}Br^-]^+ = 659.4$ ;  $[(M - 2Br) / 2]^+ = 289.7$ .

**Table S1.** Stability of the Au@16-3-16 and Au@16-3-16/DNA-TC (C<sub>i</sub>) nanosystems over time after preparation of different nanoformulations. Absorbance measurements were carried out at the maximum SPR band of gold nanosystems in each case.

| Nanosystem                                                         | Au@16-3-16    | C <sub>1</sub> | C <sub>2</sub> | C <sub>3</sub> |
|--------------------------------------------------------------------|---------------|----------------|----------------|----------------|
| In situ<br>$\lambda_{\text{MAX,SPR}}/\text{Abs}_{\text{MAX,SPR}}$  | 519 nm/0.0818 | 521 nm/0.3020  | 521 nm/0.3852  | 522 nm/0.6289  |
| 24 hours<br>$\lambda_{\text{MAX,SPR}}/\text{Abs}_{\text{MAX,SPR}}$ | 519 nm/0.0818 | 521 nm/0.2661  | 521 nm/0.3712  | 522 nm/0.4878  |
| 48 hours<br>$\lambda_{\text{MAX,SPR}}/\text{Abs}_{\text{MAX,SPR}}$ | 519 nm/0.0819 | 521 nm/0.2623  | 521 nm/0.3577  | 522 nm/0.4686  |
| 1 week<br>$\lambda_{\text{MAX,SPR}}/\text{Abs}_{\text{MAX,SPR}}$   | 519 nm/0.0820 | 521 nm/0.2677  | 521 nm/0.3738  | 522 nm/0.4494  |
| 2 weeks<br>$\lambda_{\text{MAX,SPR}}/\text{Abs}_{\text{MAX,SPR}}$  | 519 nm/0.0833 | 521 nm/0.2635  | 521 nm/0.3700  | 522 nm/0.4063  |
| 3 weeks<br>$\lambda_{\text{MAX,SPR}}/\text{Abs}_{\text{MAX,SPR}}$  | 519 nm/0.0841 | 521 nm/0.2663  | 521 nm/0.3572  | 522 nm/0.4675  |
| 1 month<br>$\lambda_{\text{MAX,SPR}}/\text{Abs}_{\text{MAX,SPR}}$  | 519 nm/0.0874 | 521 nm/0.2554  | 521 nm/0.3477  | 522 nm/0.4732  |

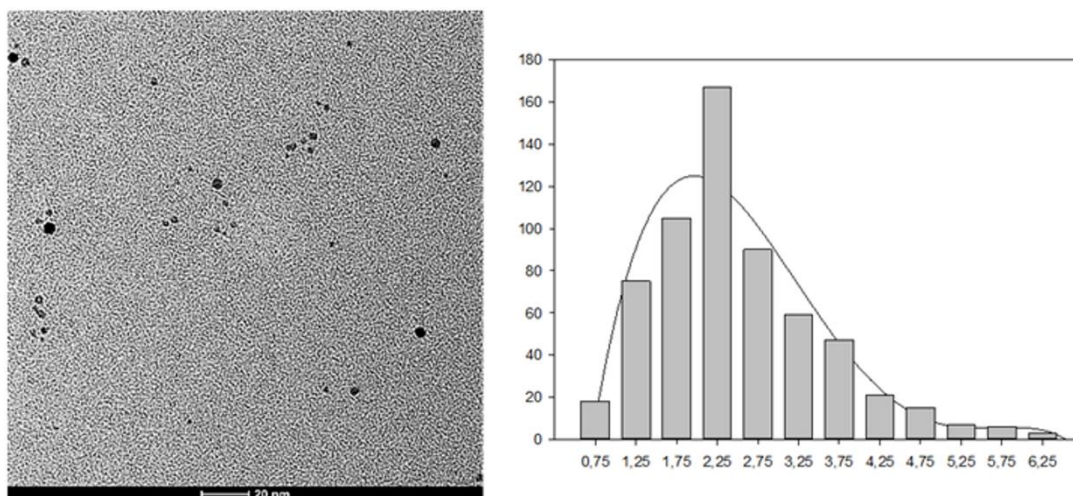

**Figure S2.** Microphotograph made with TEM TALOS, showing the gold core of the nanoparticles and the corresponding histogram of the size distribution made with the Image J program on 500 gold cores of the nanoparticles.

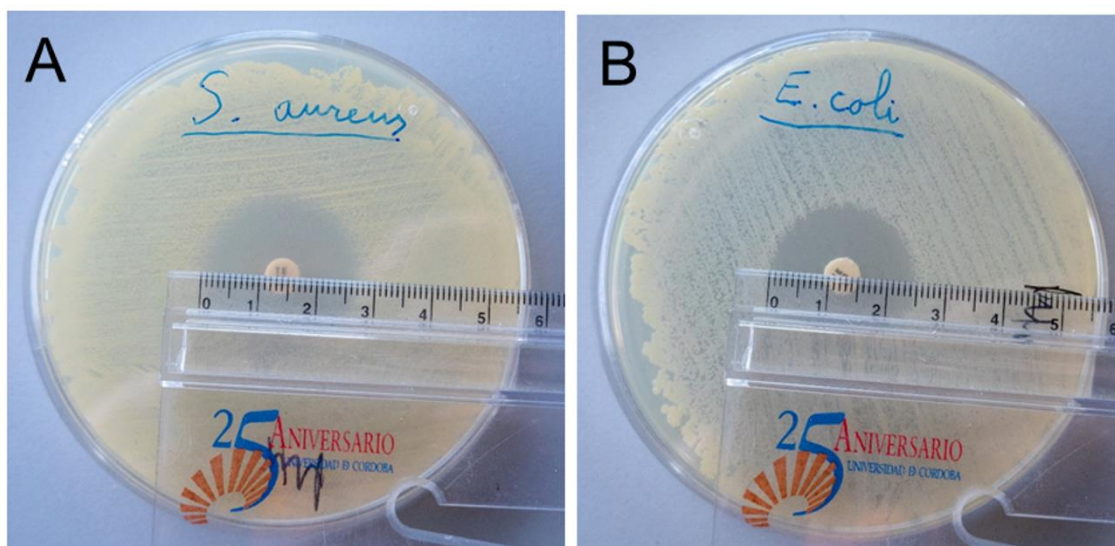

**Figure S3.** Disk diffusion test of reference *S. aureus* (A) and *E. coli* (B) strains against tetracycline.

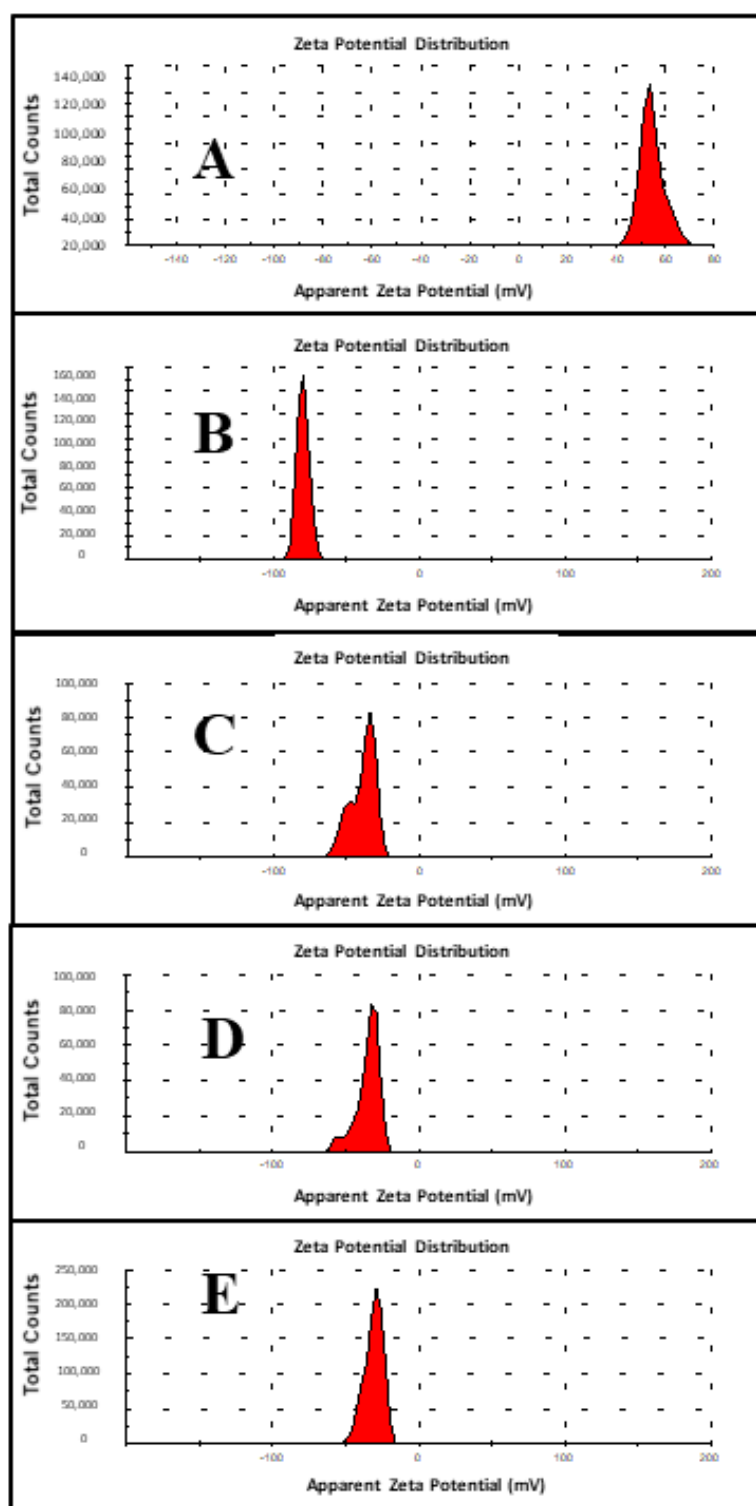

**Figure S4.** Zeta potential of Au@16-3-16, DNA/TC complex and Au@16-3-16 /DNA-TC nanosystems in water. **(A)** Au@16-3-16,  $C_{\text{Au@16-3-16}} = 17.0 \text{ nM}$  **(B)** DNA/TC complex,  $C_{\text{Au@16-3-16}} = 0 \text{ nM}$  **(C)** C<sub>1</sub>,  $C_{\text{Au@16-3-16}} = 51 \text{ nM}$ ; **(D)** C<sub>2</sub>,  $C_{\text{Au@16-3-16}} = 74 \text{ nM}$ , and **(E)** C<sub>3</sub>,  $C_{\text{Au@16-3-16}} = 130 \text{ nM}$ . A fixed concentration of DNA and TC ( $C_{\text{DNA}} = 100 \text{ }\mu\text{M}$  and  $C_{\text{TC}} = 50 \text{ }\mu\text{M}$ ) were used for the preparation of the complexes.

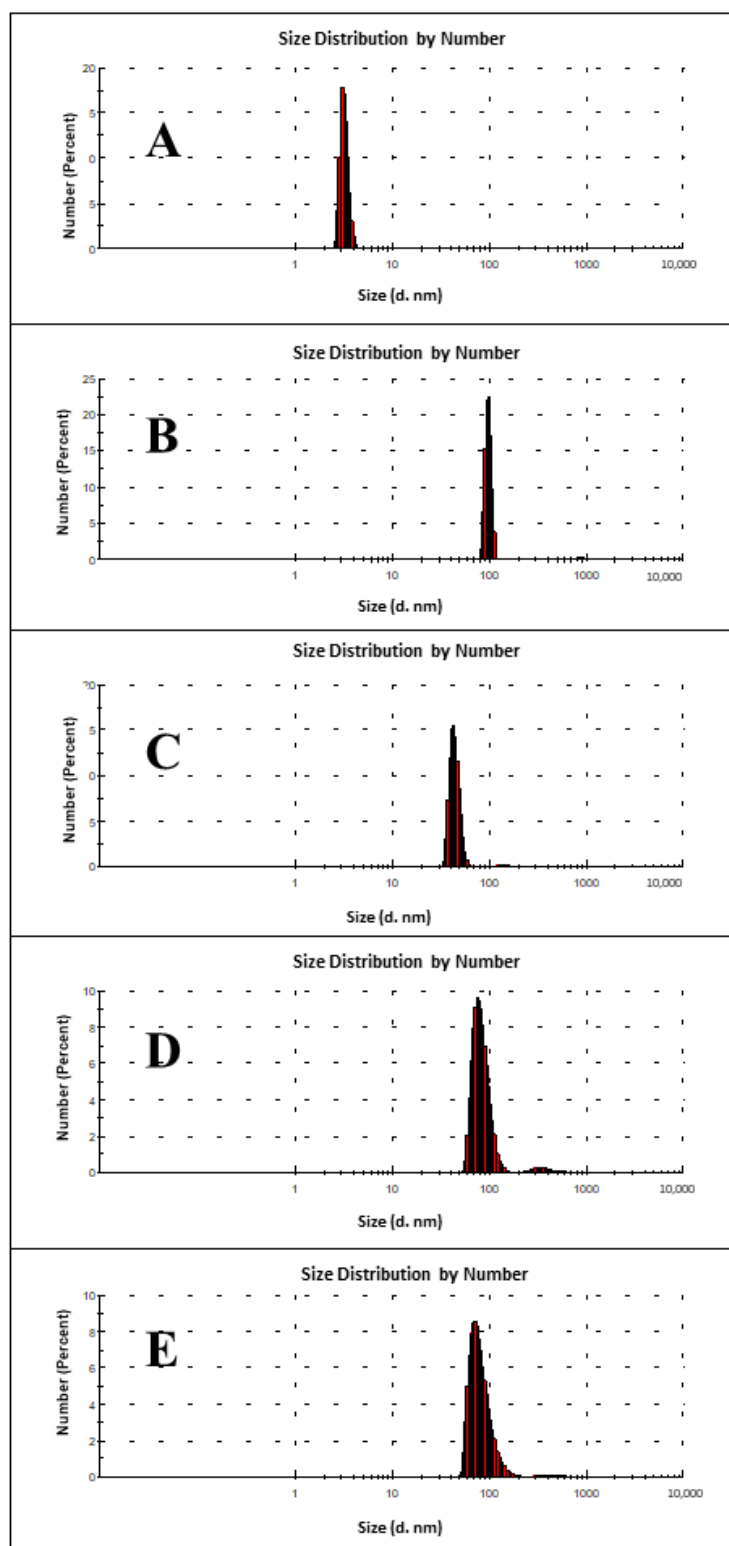

**Figure S5.** DLS size distribution by number of Au@16-3-16, DNA/TC complex and Au@16-3-16 /DNA-TC nanosystems in water. (A) Au@16-3-16,  $C_{\text{Au@16-3-16}} = 17.0 \text{ nM}$  (B) DNA/TC complex,  $C_{\text{Au@16-3-16}} = 0 \text{ nM}$  (C)  $C_1$ ,  $C_{\text{Au@16-3-16}} = 51 \text{ nM}$ ; (D)  $C_2$ ,  $C_{\text{Au@16-3-16}} = 74 \text{ nM}$ , and (E)  $C_3$ ,  $C_{\text{Au@16-3-16}} = 130 \text{ nM}$ . A fixed concentration of DNA and TC ( $C_{\text{DNA}} = 100 \text{ }\mu\text{M}$  and  $C_{\text{TC}} = 50 \text{ }\mu\text{M}$ ) were used for the preparation of the complexes.



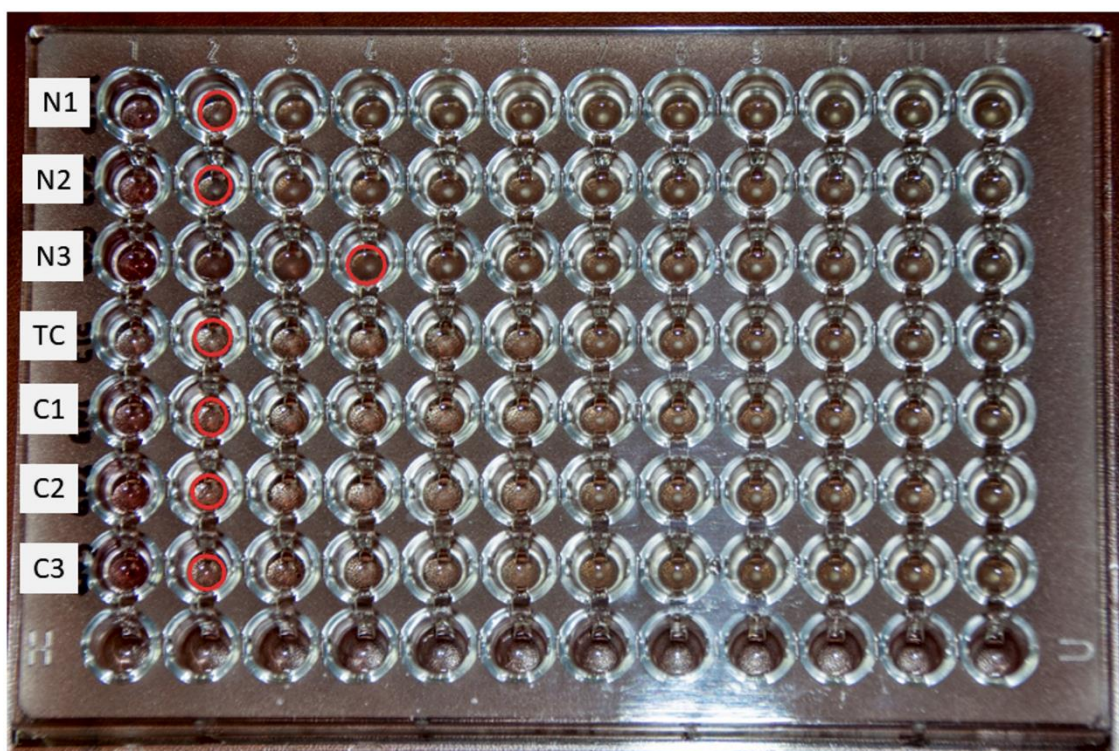

**Figure S6.** Example of microtiter plate with MIC results for *S. aureus*. The red circles denote the presence of the first bacterial button in each case.

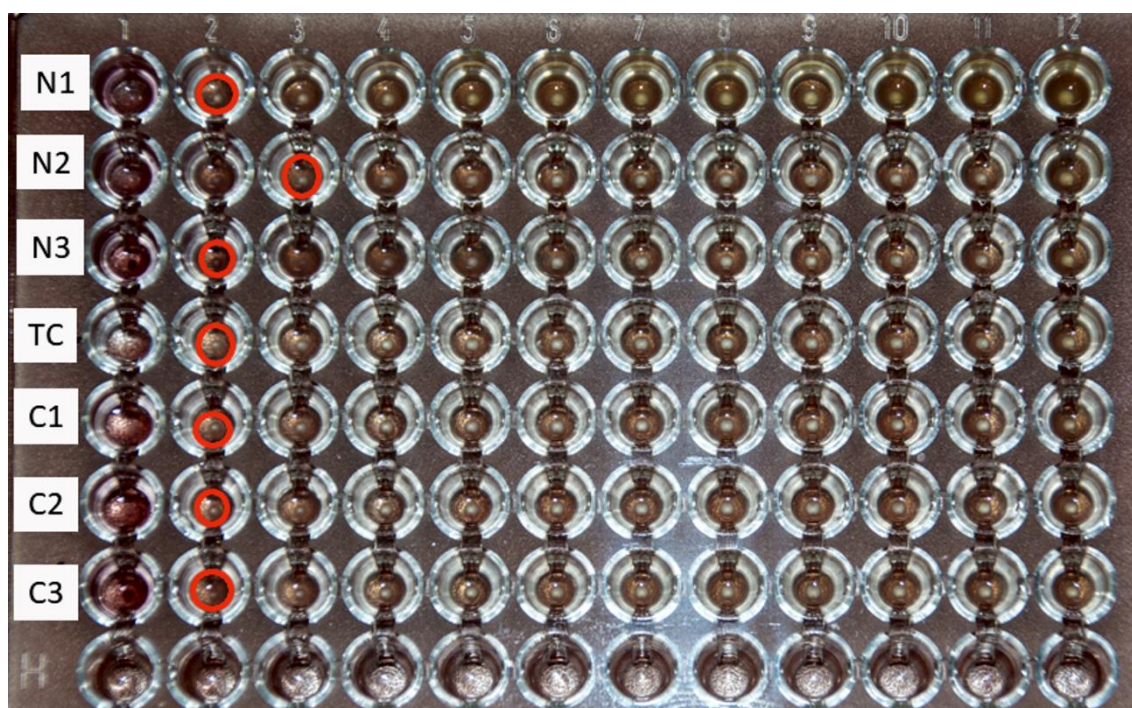

**Figure S7.** Example of microtiter plate with MIC results for *E. coli*. The red circles denote the presence of the first bacterial button in each case.



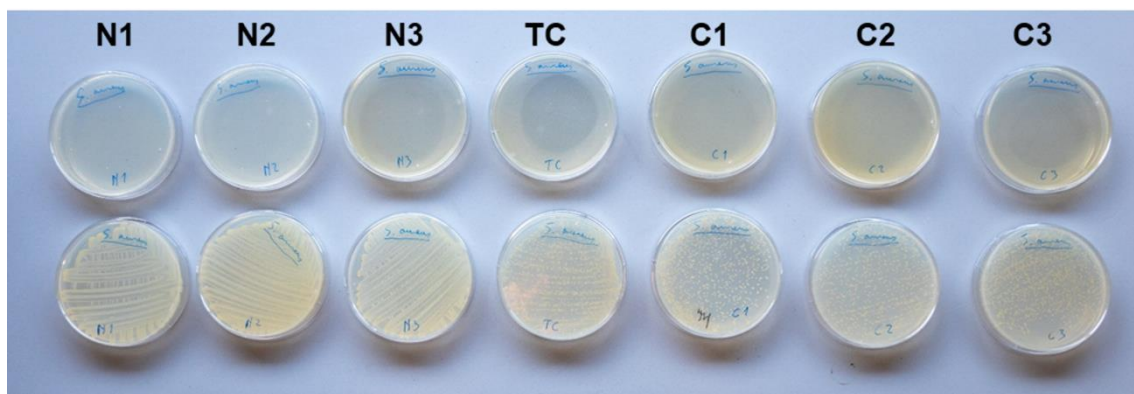

**Figure S8.** MBC of *S. aureus*. The first row corresponds to not diluted nanosystems and controls, and the second to the first dilution. The rest of the dilutions showed a dense growth. N<sub>1</sub>, N<sub>2</sub> and N<sub>3</sub> formulations correspond to  $C_{Au@16-3-16} = 51$  nM, 74 nM and 130 nM, respectively. TC control ( $C_{TC} = 50$   $\mu$ M) and C<sub>1</sub>, C<sub>2</sub>, and C<sub>3</sub> compacted Au@16-3-16/DNA-TC nanosystems.

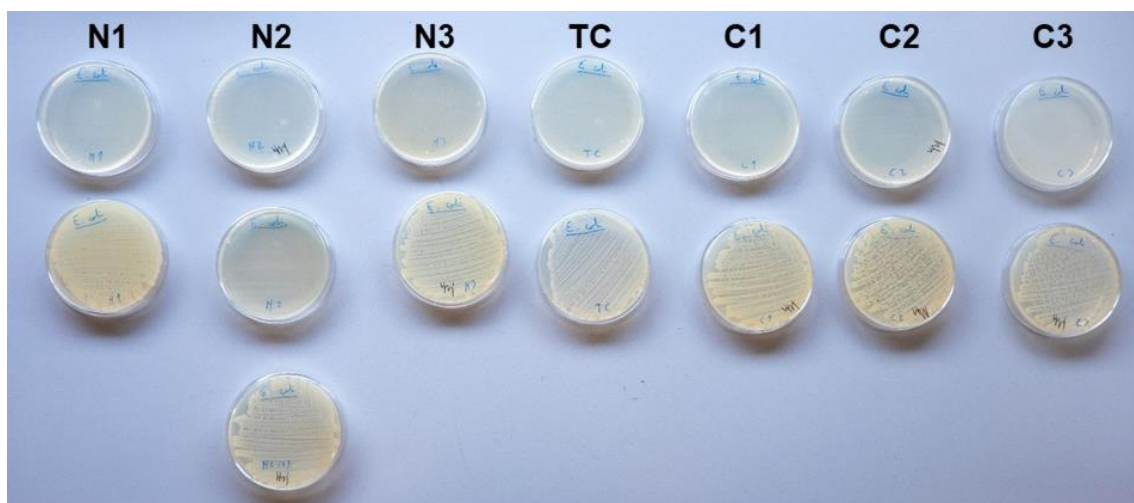

**Figure S9.** MBC of *E. coli*. The first row corresponds to not diluted nanosystems and controls, and the second and third to the first and second dilution, respectively. Control nanoparticle N<sub>2</sub> did not exhibit bacterial growth until the second dilution, as shown in the figure. The rest of the dilutions showed a dense growth. N<sub>1</sub>, N<sub>2</sub> and N<sub>3</sub> formulations correspond to  $C_{Au@16-3-16} = 51$  nM, 74 nM and 130 nM, respectively. TC control ( $C_{TC} = 50$   $\mu$ M) and C<sub>1</sub>, C<sub>2</sub>, and C<sub>3</sub> Au@16-3-16/DNA-TC compacted nanosystems.
